# Supplementary material for: Mesure de la radiosensibilité "in vitro" des lymphocytes fibroblastes et kératinocytes chez les patients traités par radiothérapie : étude de l'hétérogeneité individuelle et comparaison avec les réactions tissulaires
Source: PeerJ journal article supplement (doi:10.7717/peerj.14598), 1993-01-01

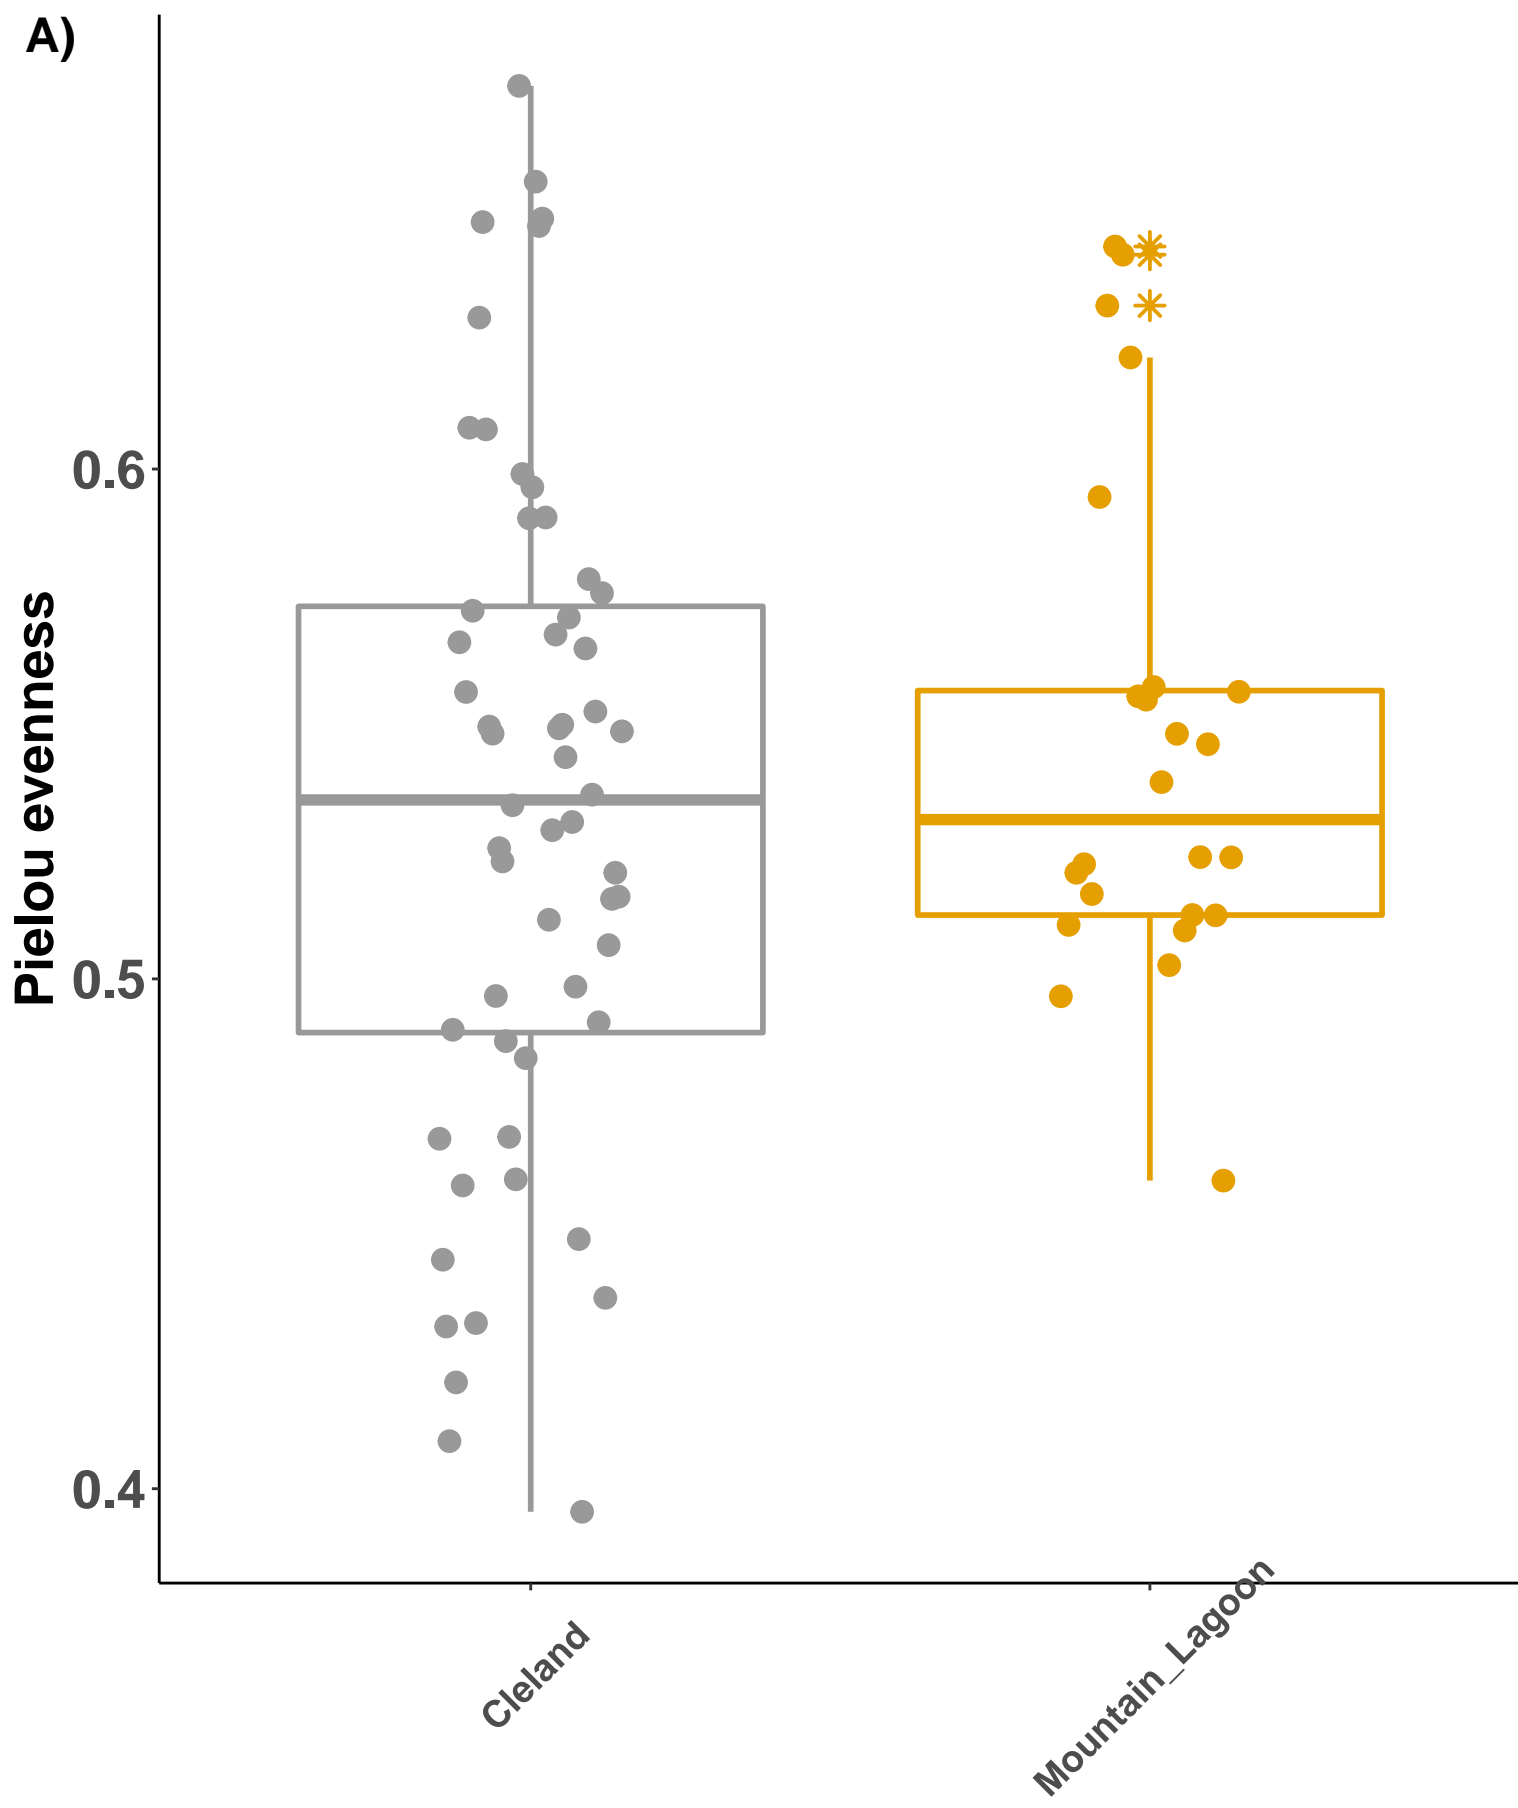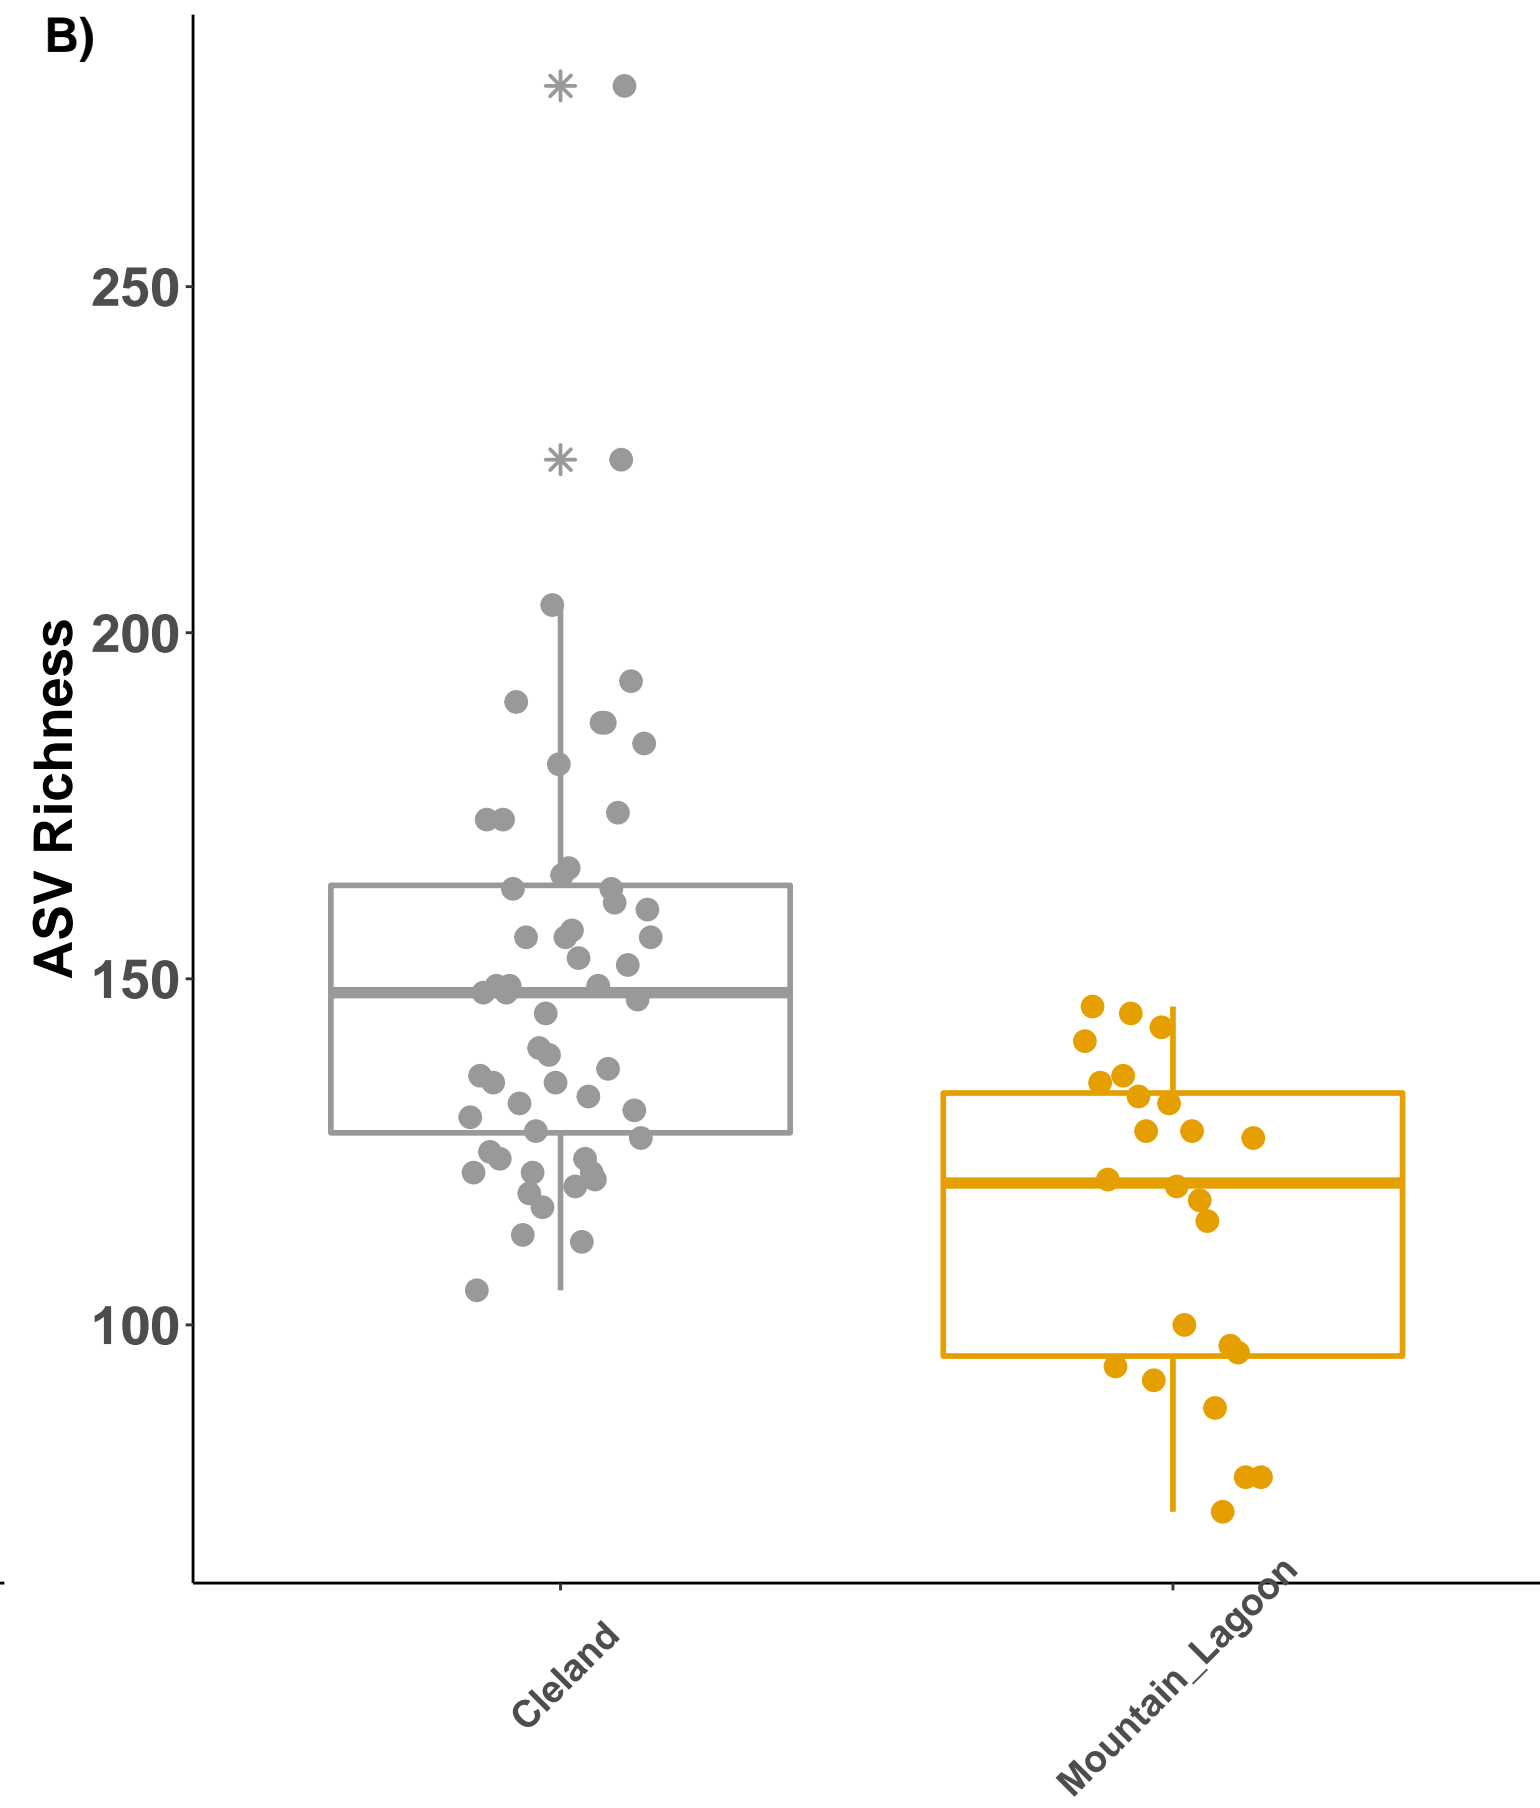

Supplement: SI_figure2.pdf [file SI_figure2.pdf]
