# Supplementary material for: Mesure de la radiosensibilité "in vitro" des lymphocytes fibroblastes et kératinocytes chez les patients traités par radiothérapie : étude de l'hétérogeneité individuelle et comparaison avec les réactions tissulaires
Source: PeerJ journal article supplement (doi:10.7717/peerj.14598), 1993-01-01

Cleland

Mountain\_Lagoon

Blaze

Byron

Claudette

George

Leo

Lola

Theo

Cin

Phasco

Reus

Tos

Uno

100  
75  
50  
25  
0

Relative abundance

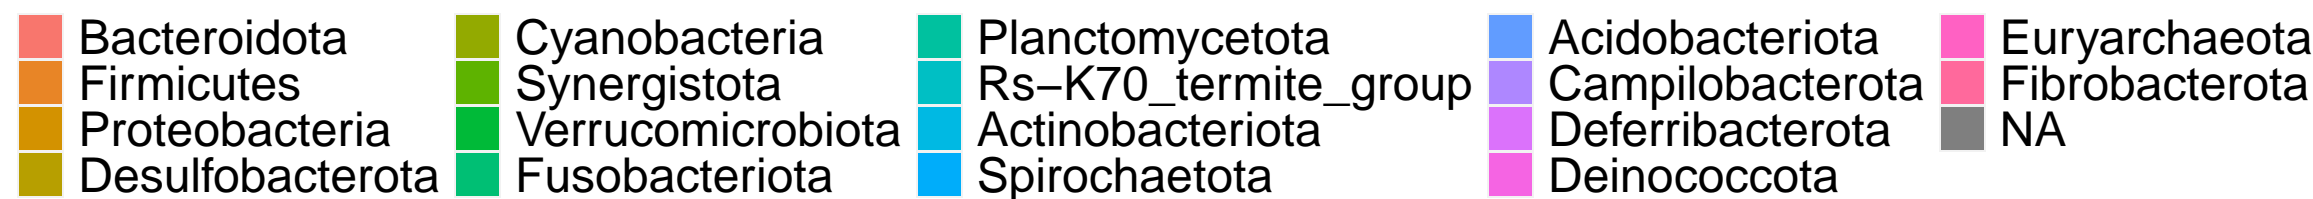

Supplement: SI_figure4.pdf [file SI_figure4.pdf]
